# Supplementary material for: A questionnaire-based (UM-PDHQ) study of hallucinations in Parkinson's disease
Source: PubMed Central journal article supplement (PMC2443167; doi:10.1186/1471-2377-8-21), 2008-06-20
Supplement: 1471-2377-8-21-S1.pdf [file 1471-2377-8-21-S1.pdf]

## The University of Miami Parkinson's disease Hallucinations Questionnaire (UM-PDHQ)

|                     |
|---------------------|
| Patient identifier: |
| DATE:               |

|                            | Question                                                                                                                                                                                                                                     | A: Features/Comments                                                                                                                     | B: Score (circle appropriate)                                                                                                                                                                                                    |
|----------------------------|----------------------------------------------------------------------------------------------------------------------------------------------------------------------------------------------------------------------------------------------|------------------------------------------------------------------------------------------------------------------------------------------|----------------------------------------------------------------------------------------------------------------------------------------------------------------------------------------------------------------------------------|
| Severity of hallucinations | 1. Do you experience hallucinations? (Have you noticed anything unusual about your vision? Have you had any unusual visual experiences? Or ever see/hear/feel/smell/taste things that are not really there or that other people do not see?) | Type: (mark appropriate)<br>1. Visual<br>2. Auditory<br>3. Somatic/Cutaneous<br>4. Gustatory<br>5. Olfactory<br>(assess each separately) | 0. No hallucinations (skip to Annex)<br><br>1. One type only<br>2. Combination<br><br>C: Not within the past month, but it has happened in the past                                                                              |
|                            | 2. How often do you experience hallucinations?                                                                                                                                                                                               |                                                                                                                                          | 0 = Only a few times<br>1 = Occasionally (less than once a week, but continuously)<br>2 = Often (about once per week)<br>3 = Frequently (several times per week but < than once per day)<br>4 = Very frequently (≥ once per day) |
|                            | 3. On average, how long do the experiences last?                                                                                                                                                                                             |                                                                                                                                          | 0 = Short Duration (< 1sec)<br>1 = Medium Duration (< 10secs)<br>2 = Prolonged Duration (> 10secs)                                                                                                                               |
|                            | 4. Do you think what you are seeing/experiencing is real?                                                                                                                                                                                    |                                                                                                                                          | 0 = Not real<br>1 = Sometimes real<br>2 = Always real                                                                                                                                                                            |
|                            | 5. How many types of images/sensations do you experience?                                                                                                                                                                                    |                                                                                                                                          | 1 = One<br>2 = Few (2 or 3)<br>3 = Several (more than 3)                                                                                                                                                                         |
|                            | 6. How severe/emotionally distressing do you find these images/sensations or visions?                                                                                                                                                        |                                                                                                                                          | 0 = No effect/Friendly<br>1 = Mildly – produce little distress<br>2 = Moderately – produce distress and are disturbing and disruptive<br>3 = Severely – very disturbing (medications may be required)                            |
|                            | Total Score (min = 0; max = 14)                                                                                                                                                                                                              |                                                                                                                                          |                                                                                                                                                                                                                                  |

Comments:

| <b>Please circle the appropriate answer and provide information</b>                                                                                                                        |                                                                                                                                                                                               |
|--------------------------------------------------------------------------------------------------------------------------------------------------------------------------------------------|-----------------------------------------------------------------------------------------------------------------------------------------------------------------------------------------------|
| 7. Have you been diagnosed with any eye disease? (i.e. near or far sight problems, double vision, cataract, glaucoma, retinitis, retinal detachment, diabetic or hypertensive eye disease) | Yes (please describe)<br>No                                                                                                                                                                   |
| 8. What are your current medications?                                                                                                                                                      | <i>Complete medication data on page 4.</i>                                                                                                                                                    |
| 9. Was there a recent change in your treatment? Please describe.                                                                                                                           | Yes (please describe)<br>No                                                                                                                                                                   |
| 10. Was this change related to the appearance or change in the characteristics of hallucinations?                                                                                          | Yes<br>No<br>I cannot tell<br>N/A                                                                                                                                                             |
| 11. Do you experience hallucinations while “on” or “off”?                                                                                                                                  | On<br>Off<br>Anytime-not related to on-offs                                                                                                                                                   |
| 12. What do you normally see/feel/hear/smell/taste?<br>If not visual describe here:<br>Voices, Music, tastes, smells, skin related:                                                        | Not formed/cannot describe<br>Whole Faces<br>Fragmented faces <input type="checkbox"/> Familiar<br>Whole people <input type="checkbox"/> Unfamiliar<br>Animals<br>Insects/reptiles<br>Objects |
| 13. Is there anything you can do to make the images/sensations disappear?                                                                                                                  | Yes<br>No                                                                                                                                                                                     |
| 14. At what time of the day or under which lighting conditions do you experience hallucinations                                                                                            | A. Specific time<br>During the day/Bright<br>During the night/Dark<br>Dim<br>B. Anytime                                                                                                       |
| 15. Do the images ever make any sound or noise (for visual hallucinations)?                                                                                                                | Yes<br>No<br>N/A (for non-visual hallucinations)                                                                                                                                              |
| 16. Do images move (for visual hallucinations)?                                                                                                                                            | Yes<br>No<br>N/A (for non-visual hallucinations)                                                                                                                                              |
| 17. Are the images normal size?                                                                                                                                                            | Yes<br>No, smaller than normal<br>No, larger than normal<br>N/A (for non-visual hallucinations)                                                                                               |
| 18. Are the images transparent or solid?                                                                                                                                                   | Transparent<br>Solid<br>N/A (for non-visual hallucinations)                                                                                                                                   |
| 19. Are the images colored?                                                                                                                                                                | Yes<br>No, (black and white)<br>N/A (for non-visual hallucinations)                                                                                                                           |
| 20. Is the onset of hallucinations gradual or sudden?                                                                                                                                      | Gradual (appear-disappear slowly)<br>Sudden (appear-disappear suddenly)<br>I cannot tell                                                                                                      |

Quality of hallucinations
